# Supplementary material for: Exploring the Adaptation of Bulinus senegalensis and Bulinus umbilicatus to the Dry and Rainy Season in Ephemeral Pond in Niakhar (Senegal), an Area of Seasonal Transmission of Urogenital Schistosomiasis
Source: MDPI journal article supplement (doi:10.3390/tropicalmed9060121), 2024-05-22
Supplement: s1 [file s1]

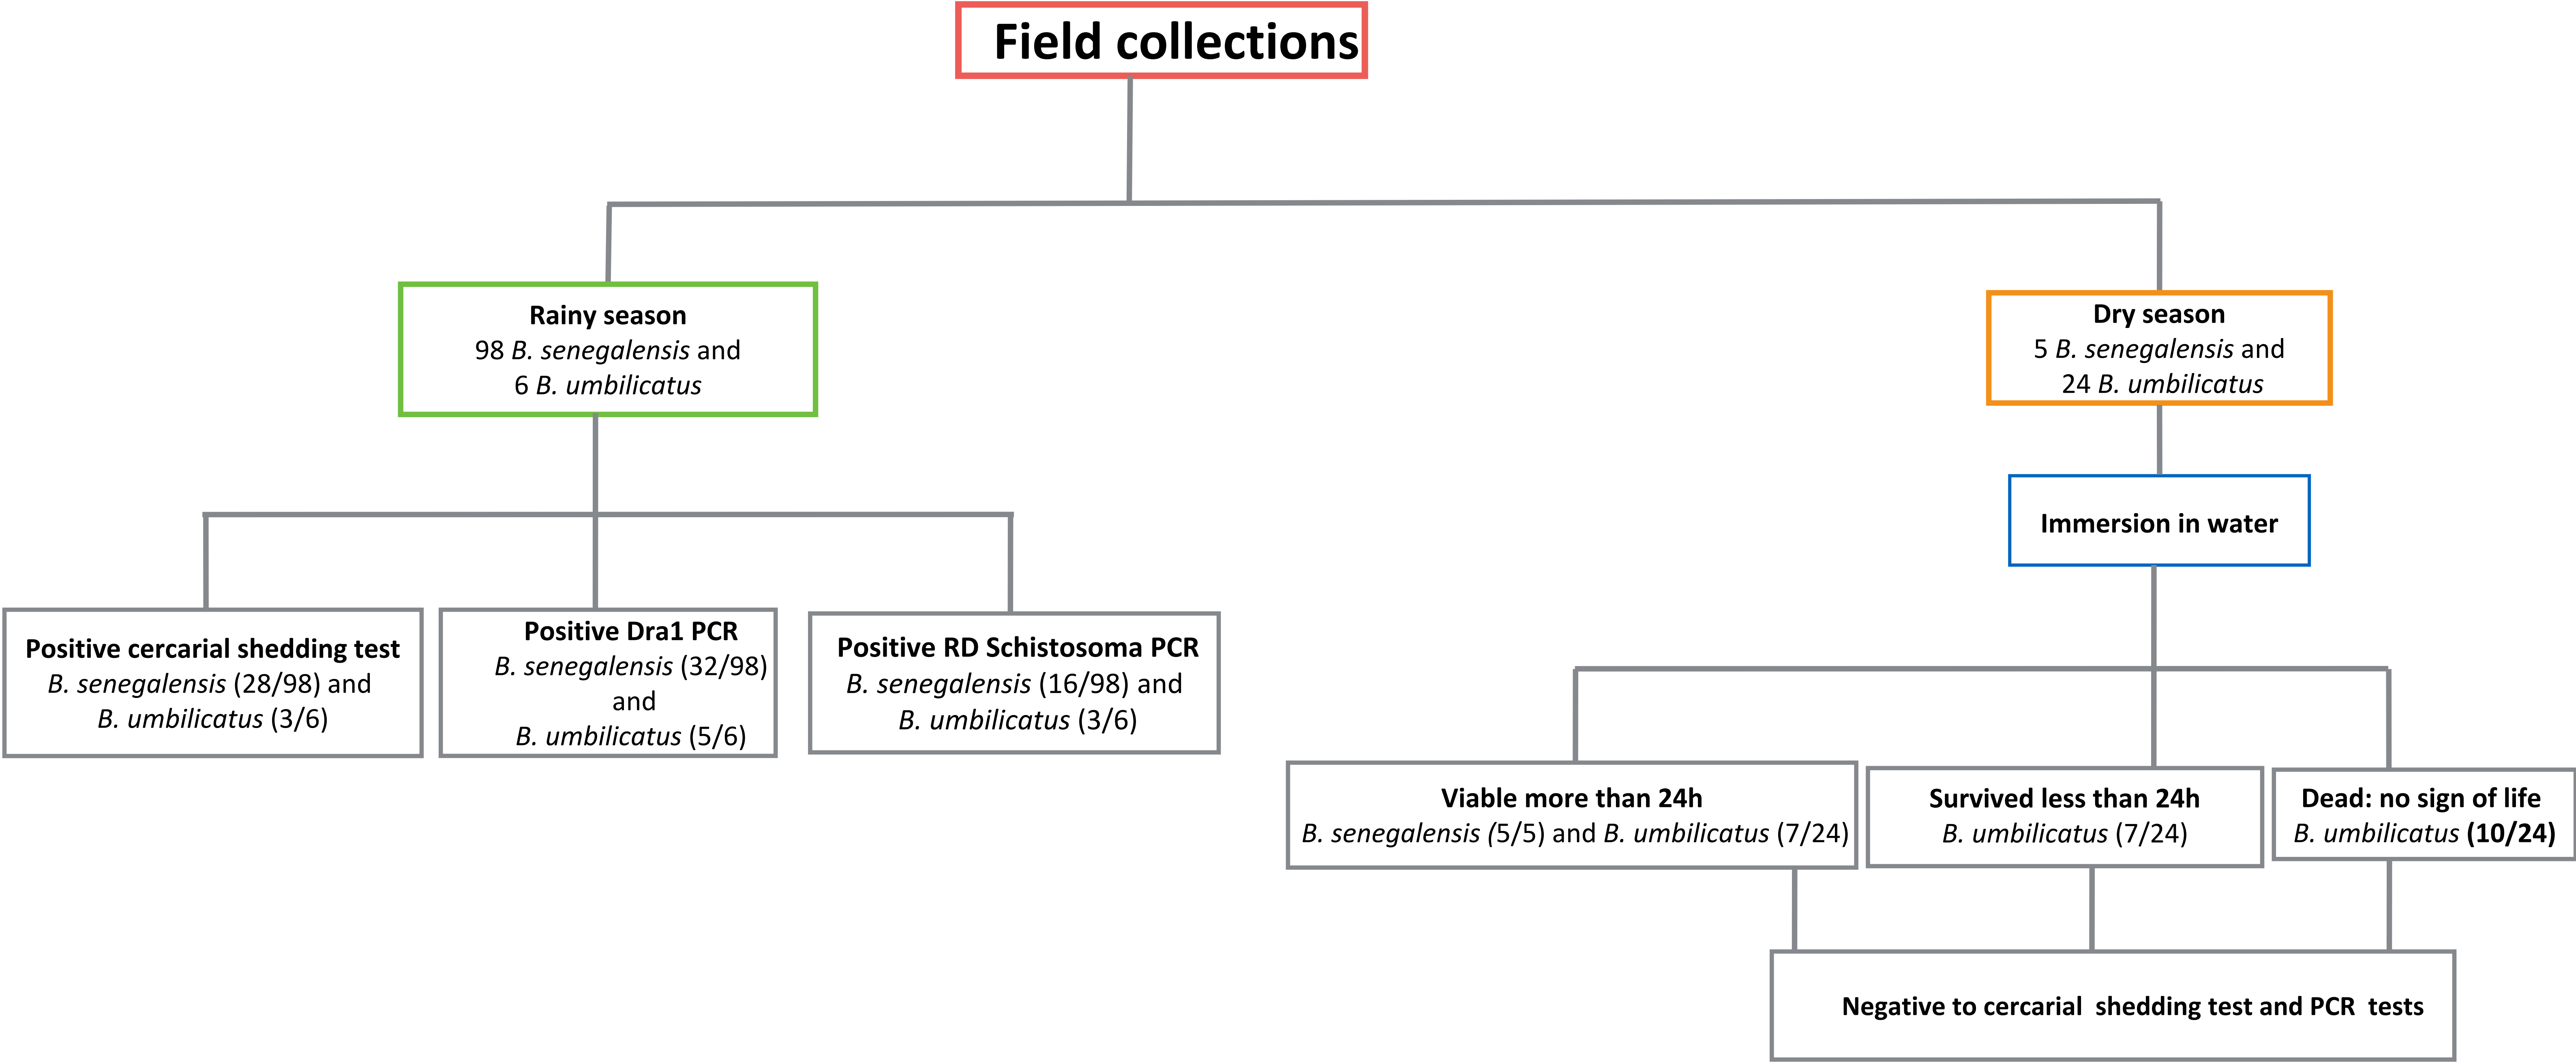

**Figure S1.** Description of the procedure used to collect molluscs during the dry and rainy seasons, to assess their viability and their infestation by *S. haematobium*.
